# Supplementary material for: Mitochondrial metabolism sustains DNMT3A-R882-mutant clonal haematopoiesis
Source: Springer Nature journal article supplement (doi:10.1038/s41586-025-08980-6), 2025-04-16
Supplement: MOESM1 [file 41586_2025_8980_MOESM1_ESM.pdf]

---

**Supplementary information**

---

**Mitochondrial metabolism sustains  
*DNMT3A*-R882-mutant clonal  
haematopoiesis**

---

In the format provided by the  
authors and unedited

# Supplementary Figure 1

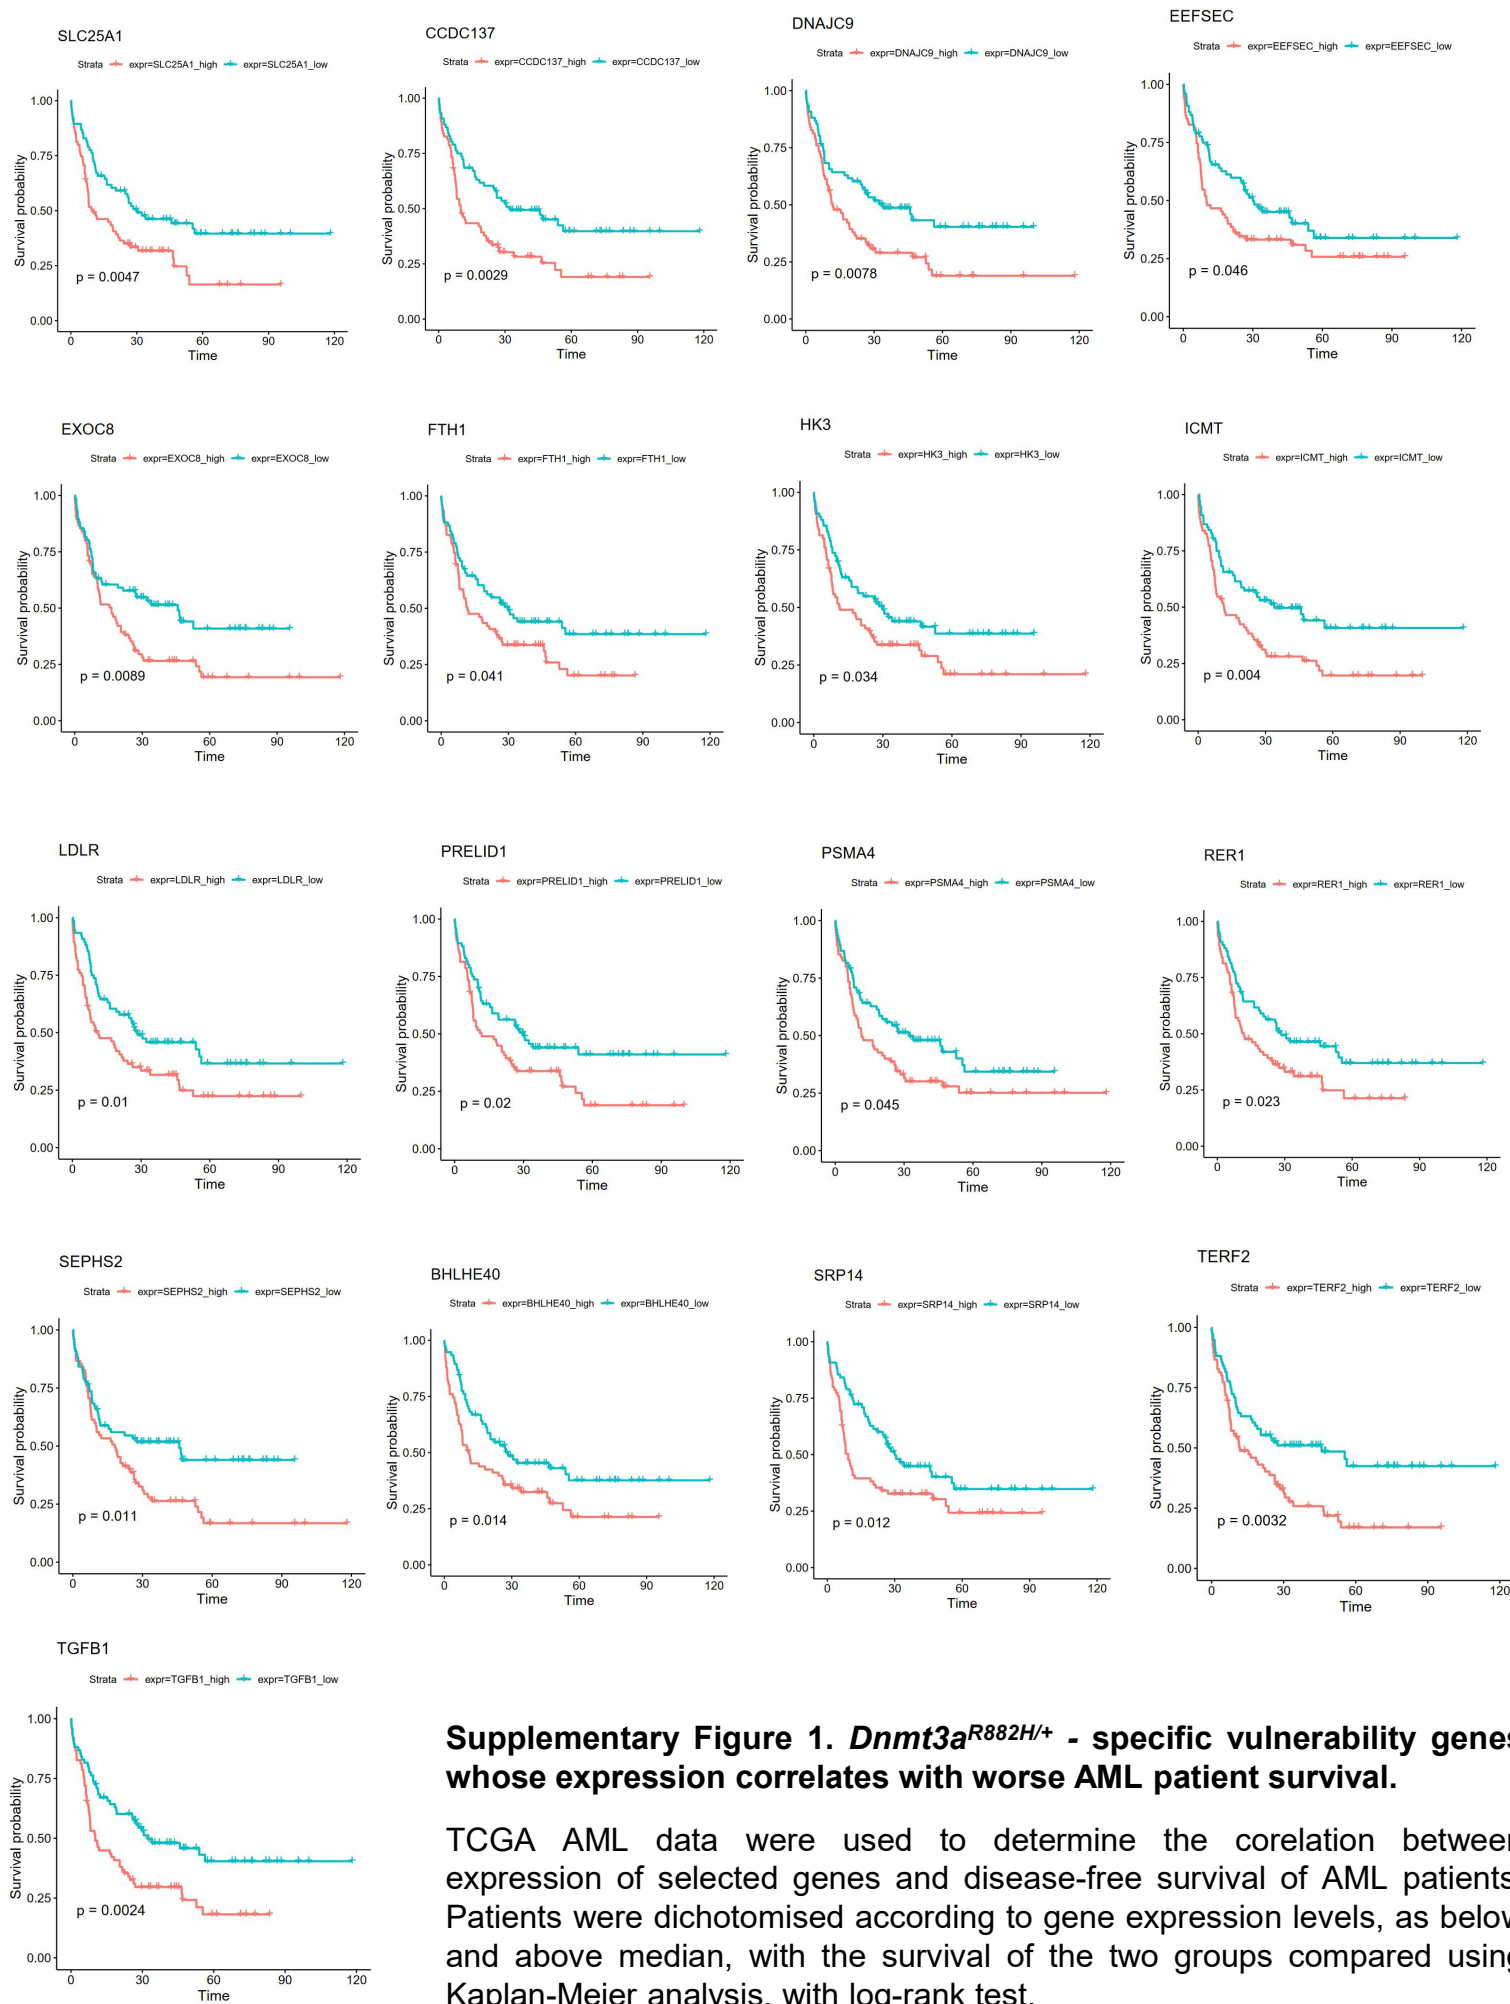

**Supplementary Figure 1. *Dnmt3a*<sup>R882H/+</sup> - specific vulnerability genes whose expression correlates with worse AML patient survival.**

TCGA AML data were used to determine the correlation between expression of selected genes and disease-free survival of AML patients. Patients were dichotomised according to gene expression levels, as below and above median, with the survival of the two groups compared using Kaplan-Meier analysis, with log-rank test.

# Supplementary Figure 2

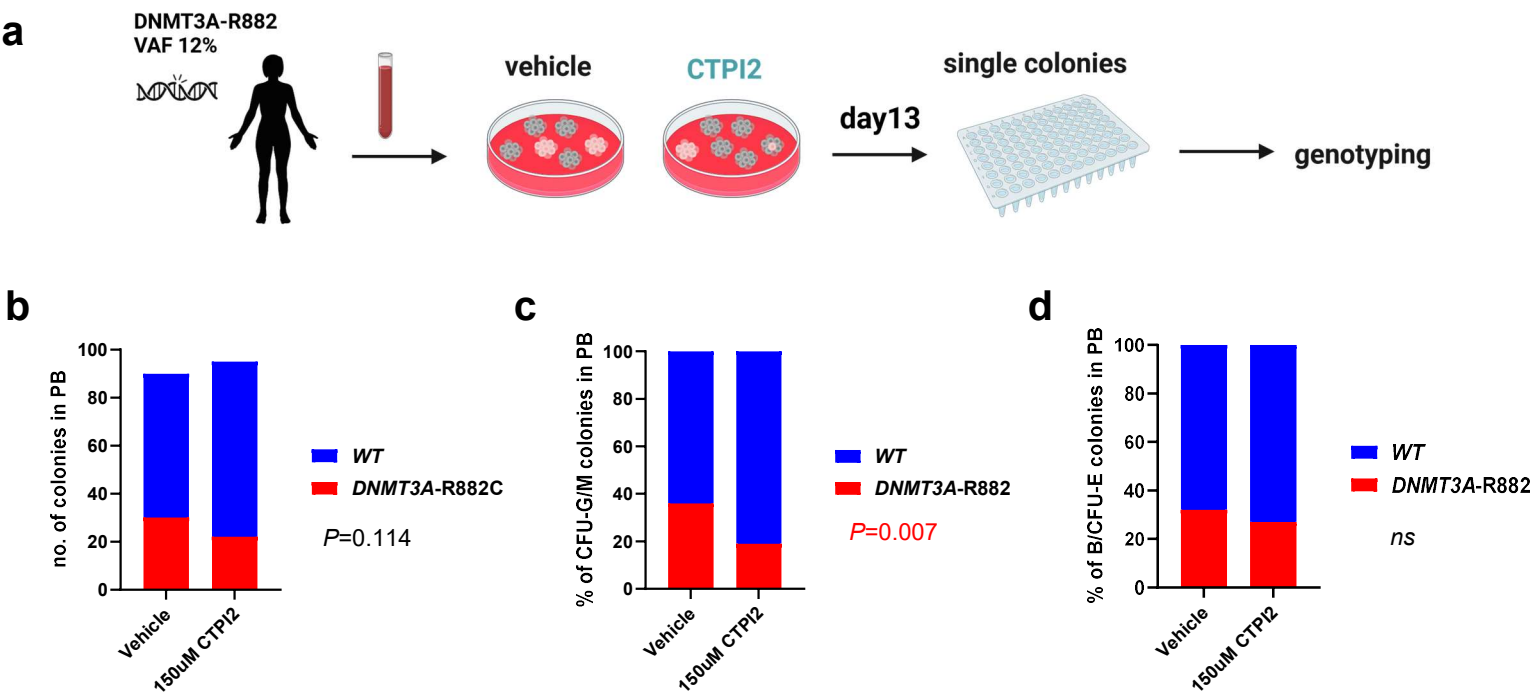

**Supplementary Figure 2. Impact of CTPI2 on human DNMT3A-R882 mutant HSPC colony formation**

(a) Schematic representation of the CTPI2 validation strategy in human primary DNMT3A-R882 CH (b) Quantification of the proportion of all (c) CFU-G/M and (d) B/CFU-E colonies in CTPI2 and vehicle treated cells. P by two-sided Chi-square test.

# Supplementary Figure 3

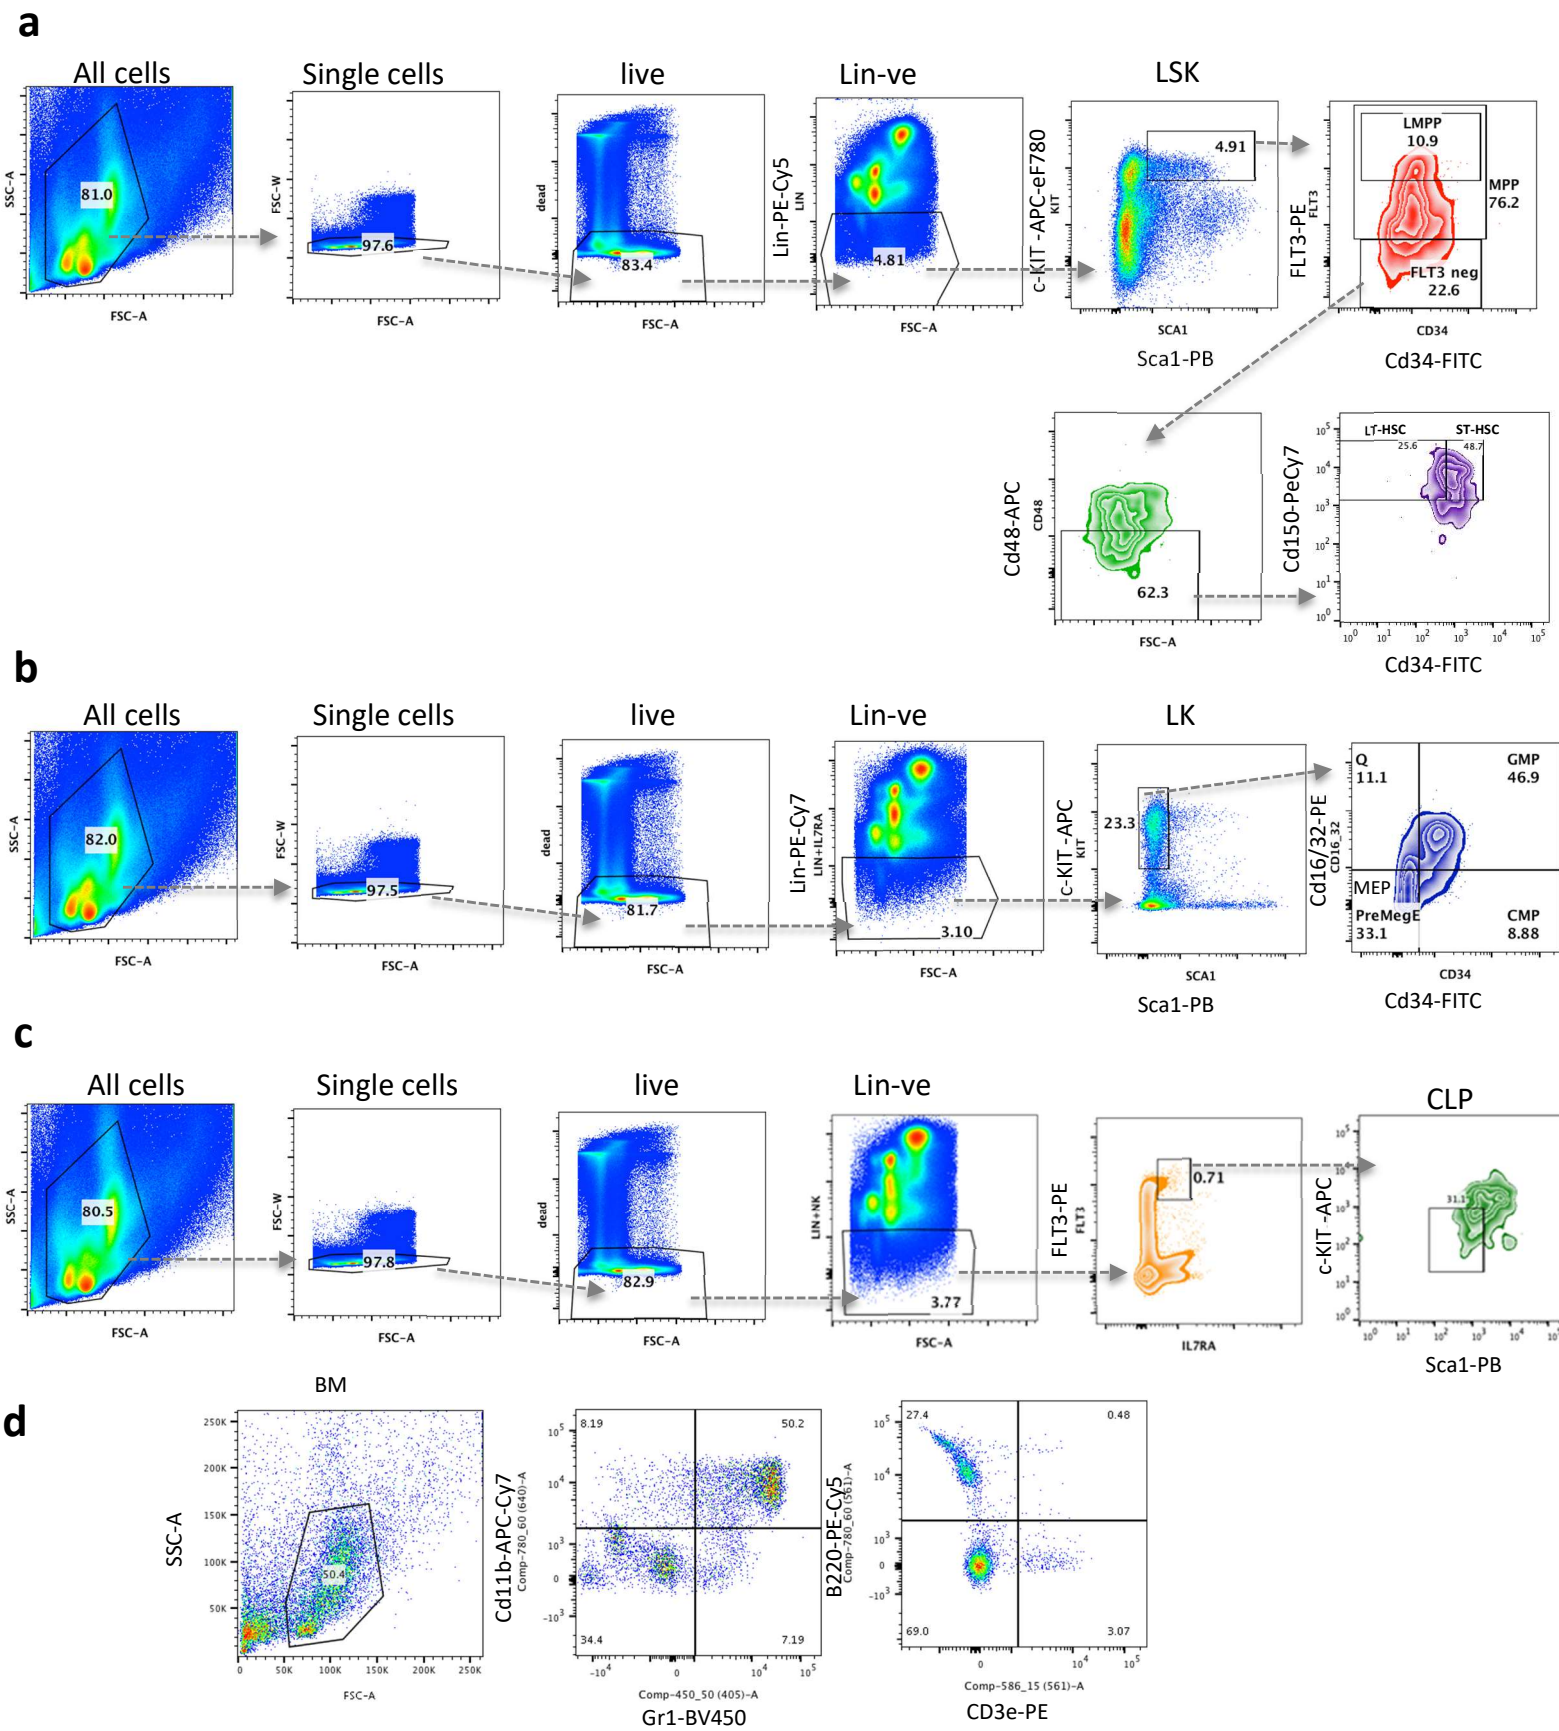

**Supplementary Figure 3. Flow cytometry gating strategies for progenitor and differentiated blood panels shown in Extended Data Figure 1.**

(a) Gating strategy for progenitor compartment shown in Extended Data Fig.1c-g, l-m (b) Gating strategy for LK, GMP, MEP and CMP shown in Extended Data Fig.1k. (c) CLP gating strategy in Extended Data Fig.1 g, n. (d) Gating strategy for differentiated cells used in Extended Data Figure 1h-j. Myeloid cells were defined as Mac1 and/or Gr1 positive; T cells as CD3 positive, B cells as B220 positive.

# Supplementary Figure 4

a

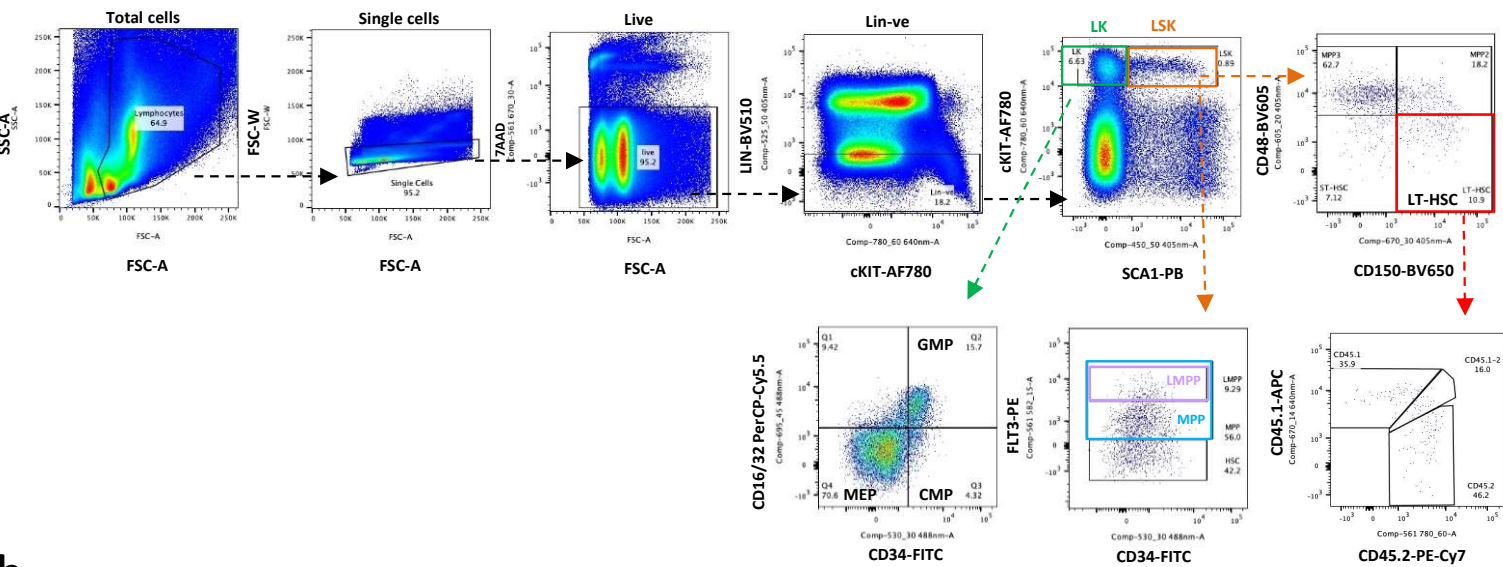

b

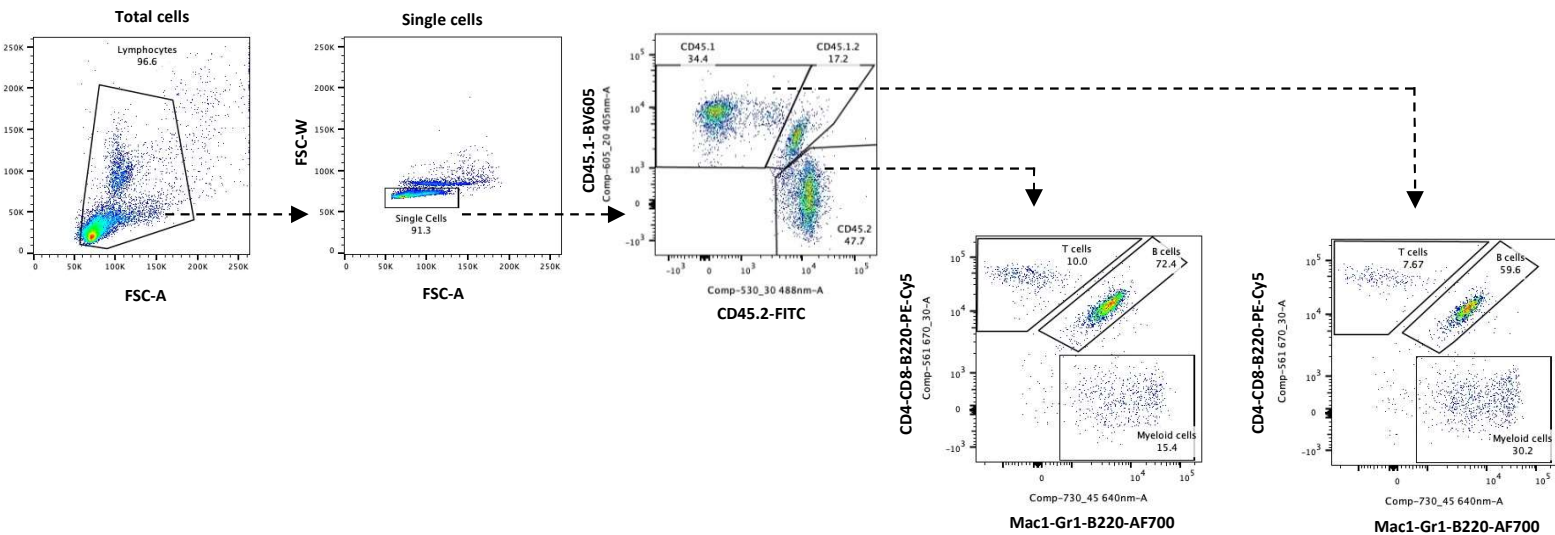

**Supplementary Figure 4. Flow cytometry gating strategies for progenitor and differentiated blood panels shown in Figure 1, 4 and Extended Data Figure 2,6-7.**

(a) LT-HSC and progenitor flow cytometry gating strategy used for transplanted mice in Fig.1g, Fig.4 b-j and Extended Data Figures: 2c, 6b-g, 6p-s, 7i-j, 7l-o (b) Flow cytometry gating strategy for B, T and Myeloid cells in PB, SP, BM used in transplant experiment. PB data are shown. The gating strategy was used in Extended Data Figures: 6h-k, 7a-d, 7k, 7q.



Supplementary Figure 5

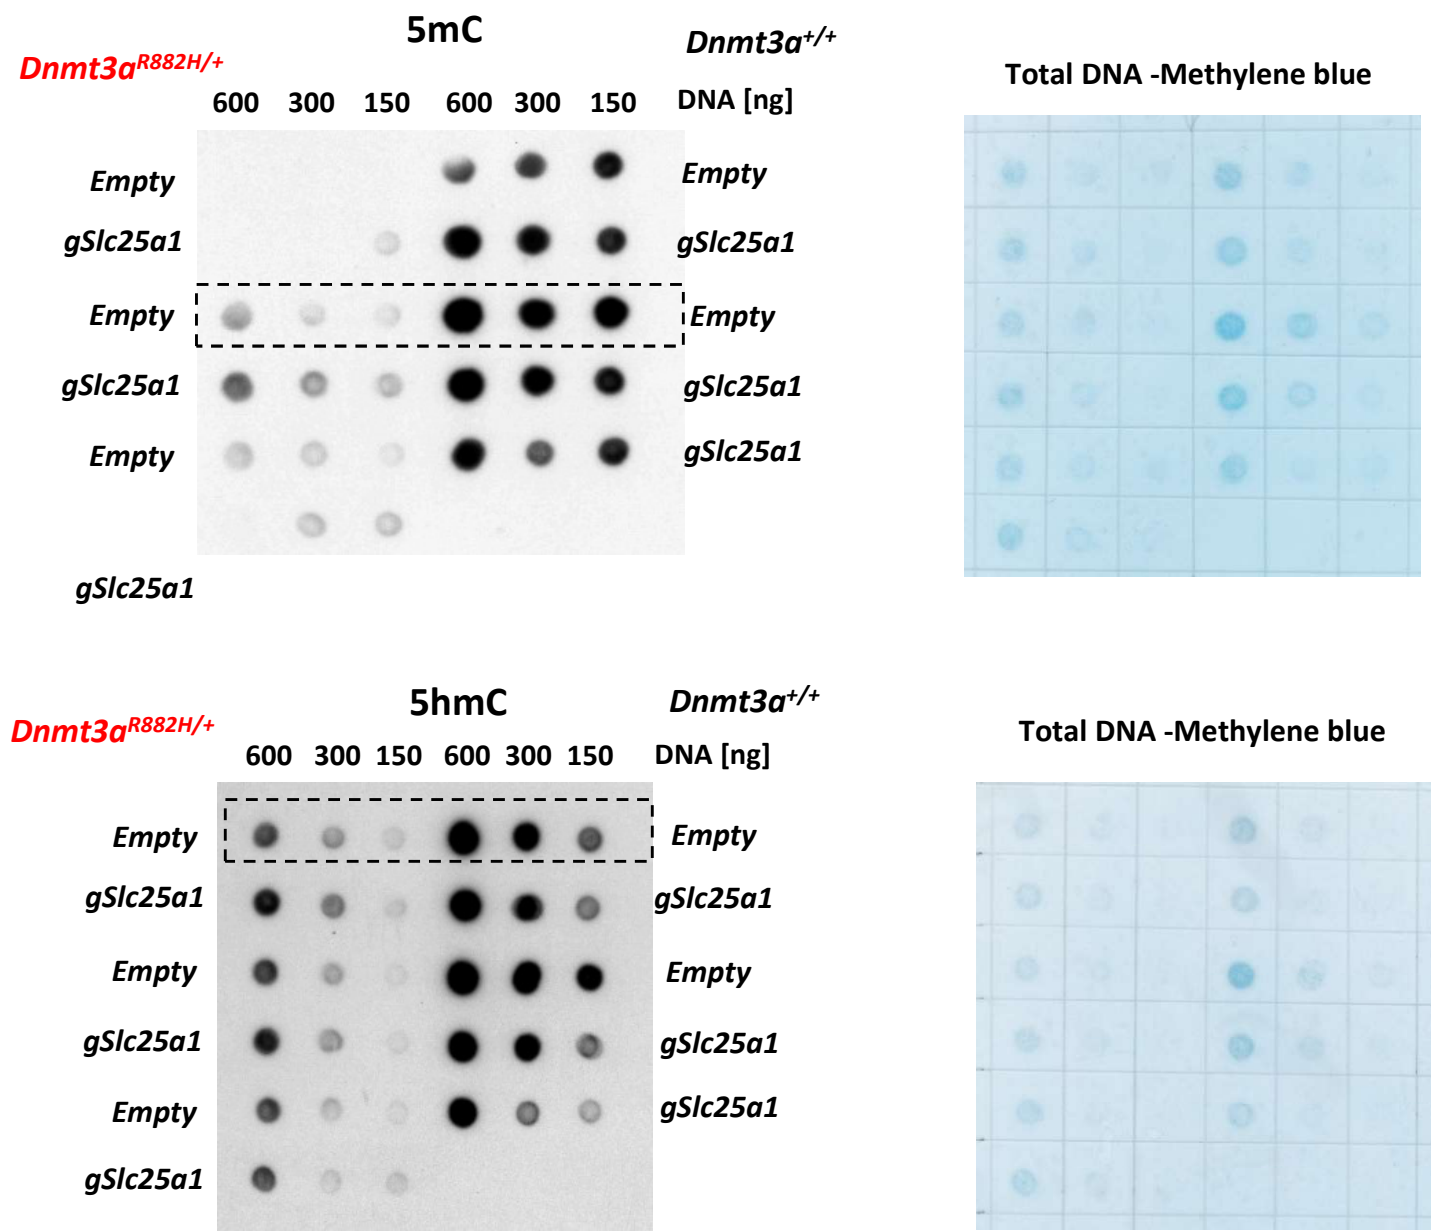

Supplementary Figure 5. Unprocessed dot blot images for Extended data Fig.8e

Unprocessed dot blot images are shown on the left, with corresponding total DNA image (DNA loading control – methylene blue staining) for each blot on the right. Cropping strategy is indicated with a dashed line.

Supplementary Figure 6

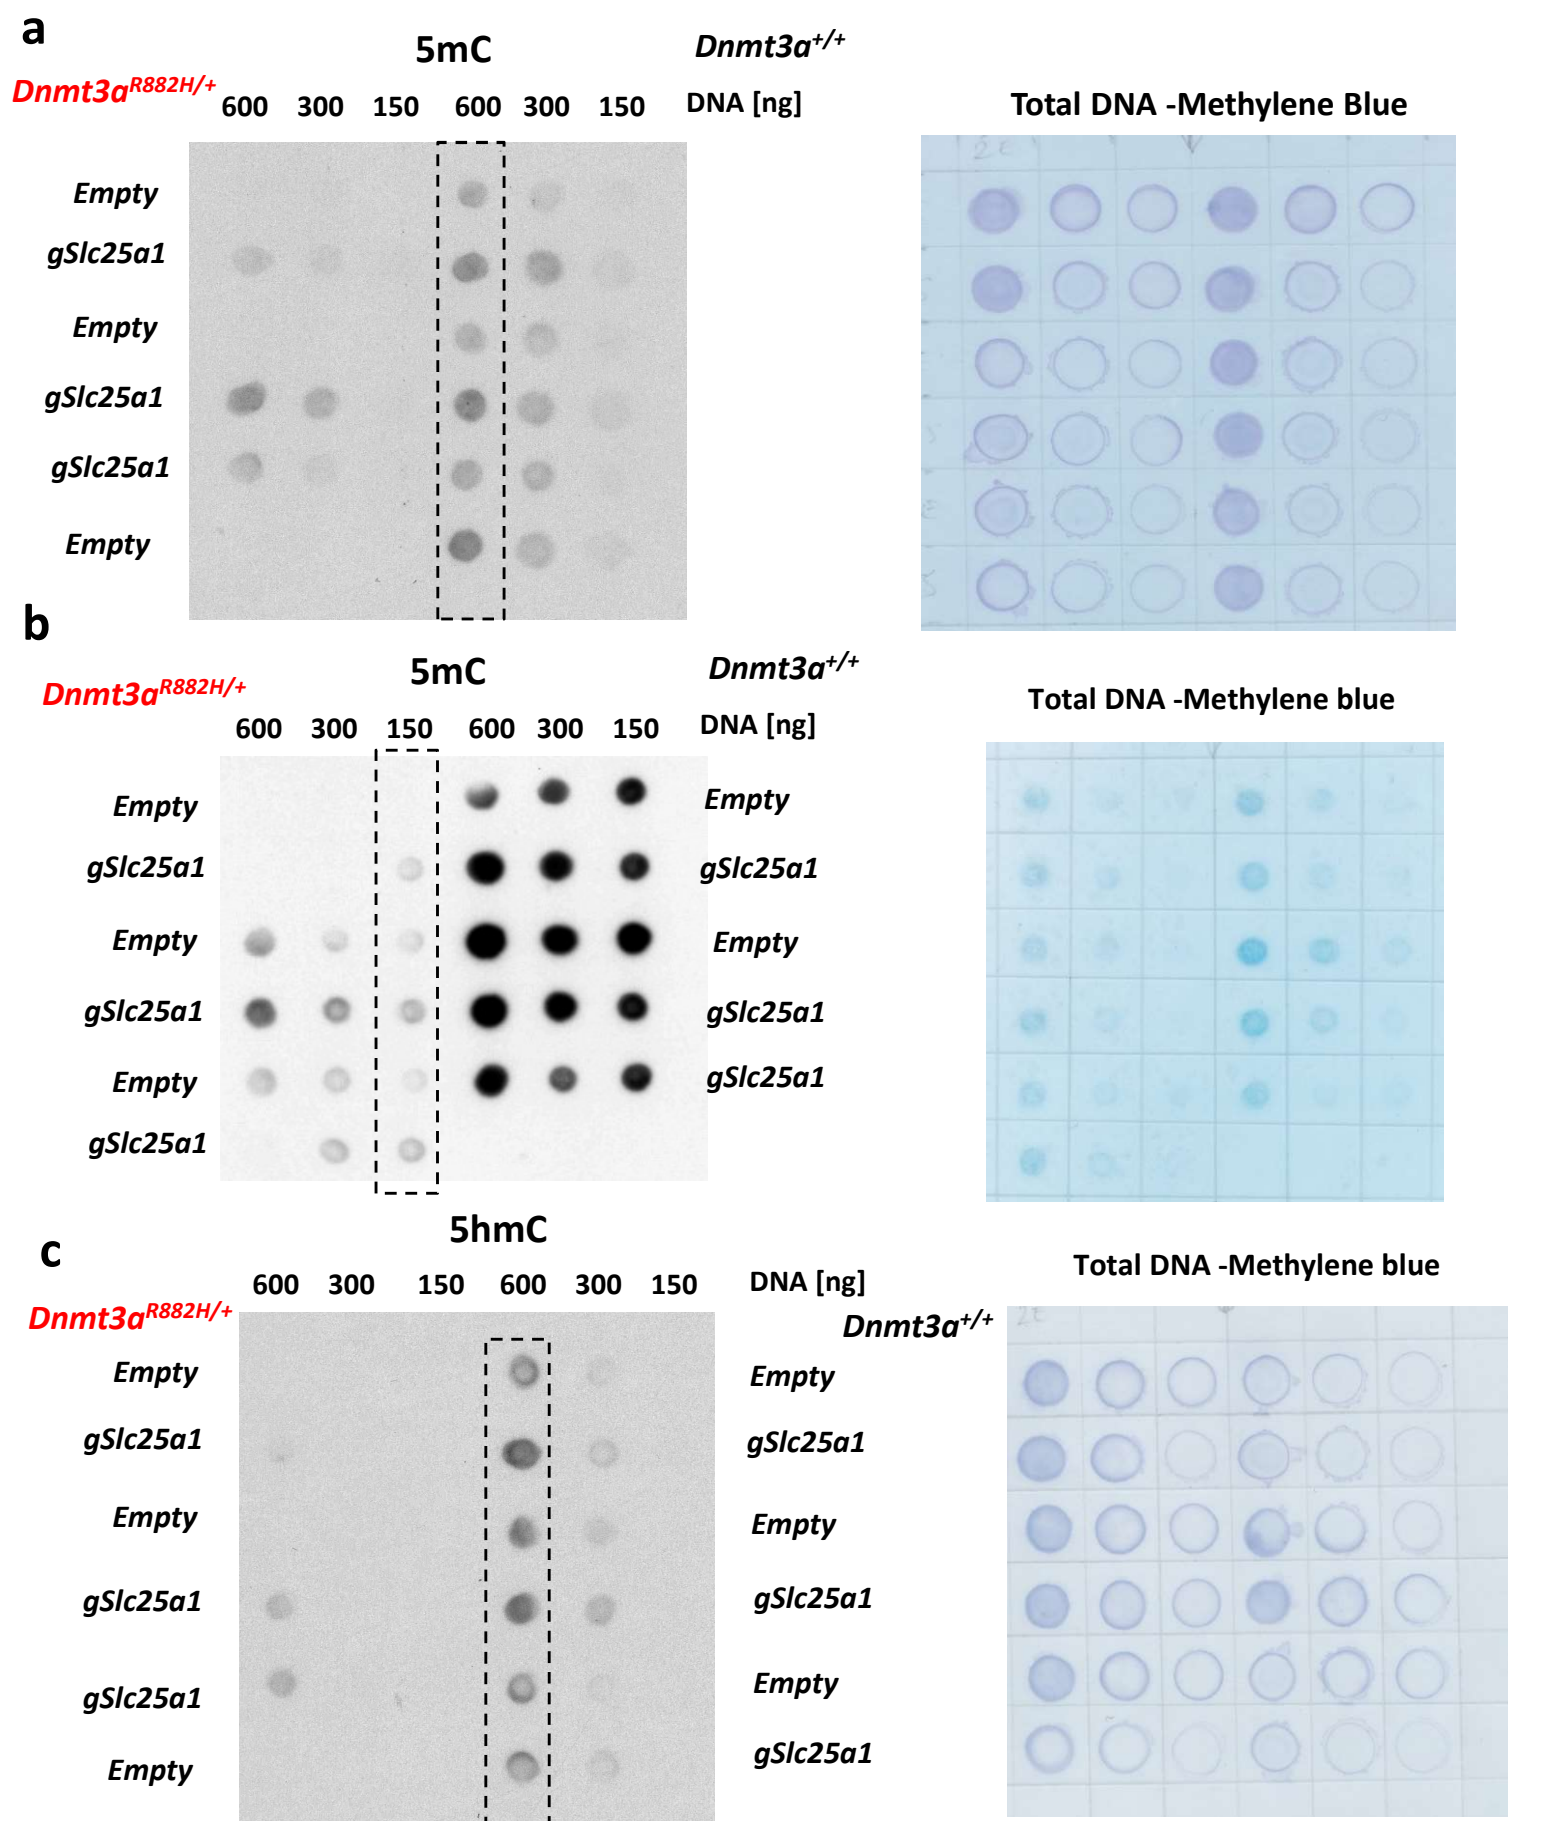

**Supplementary Figure 6. Unprocessed dot blot images for Extended data Fig.8h, i, j**  
(a-c) Unprocessed dot blot images are shown on the left, with corresponding total DNA image (DNA loading control – methylene blue staining) for each blot on the right. Cropping strategy is indicated with a dashed line. Data correspond to (a) Extended data Fig.8h (b) Extended data Fig.8i (c) Extended data Fig.8j.

Supplementary Figure 7

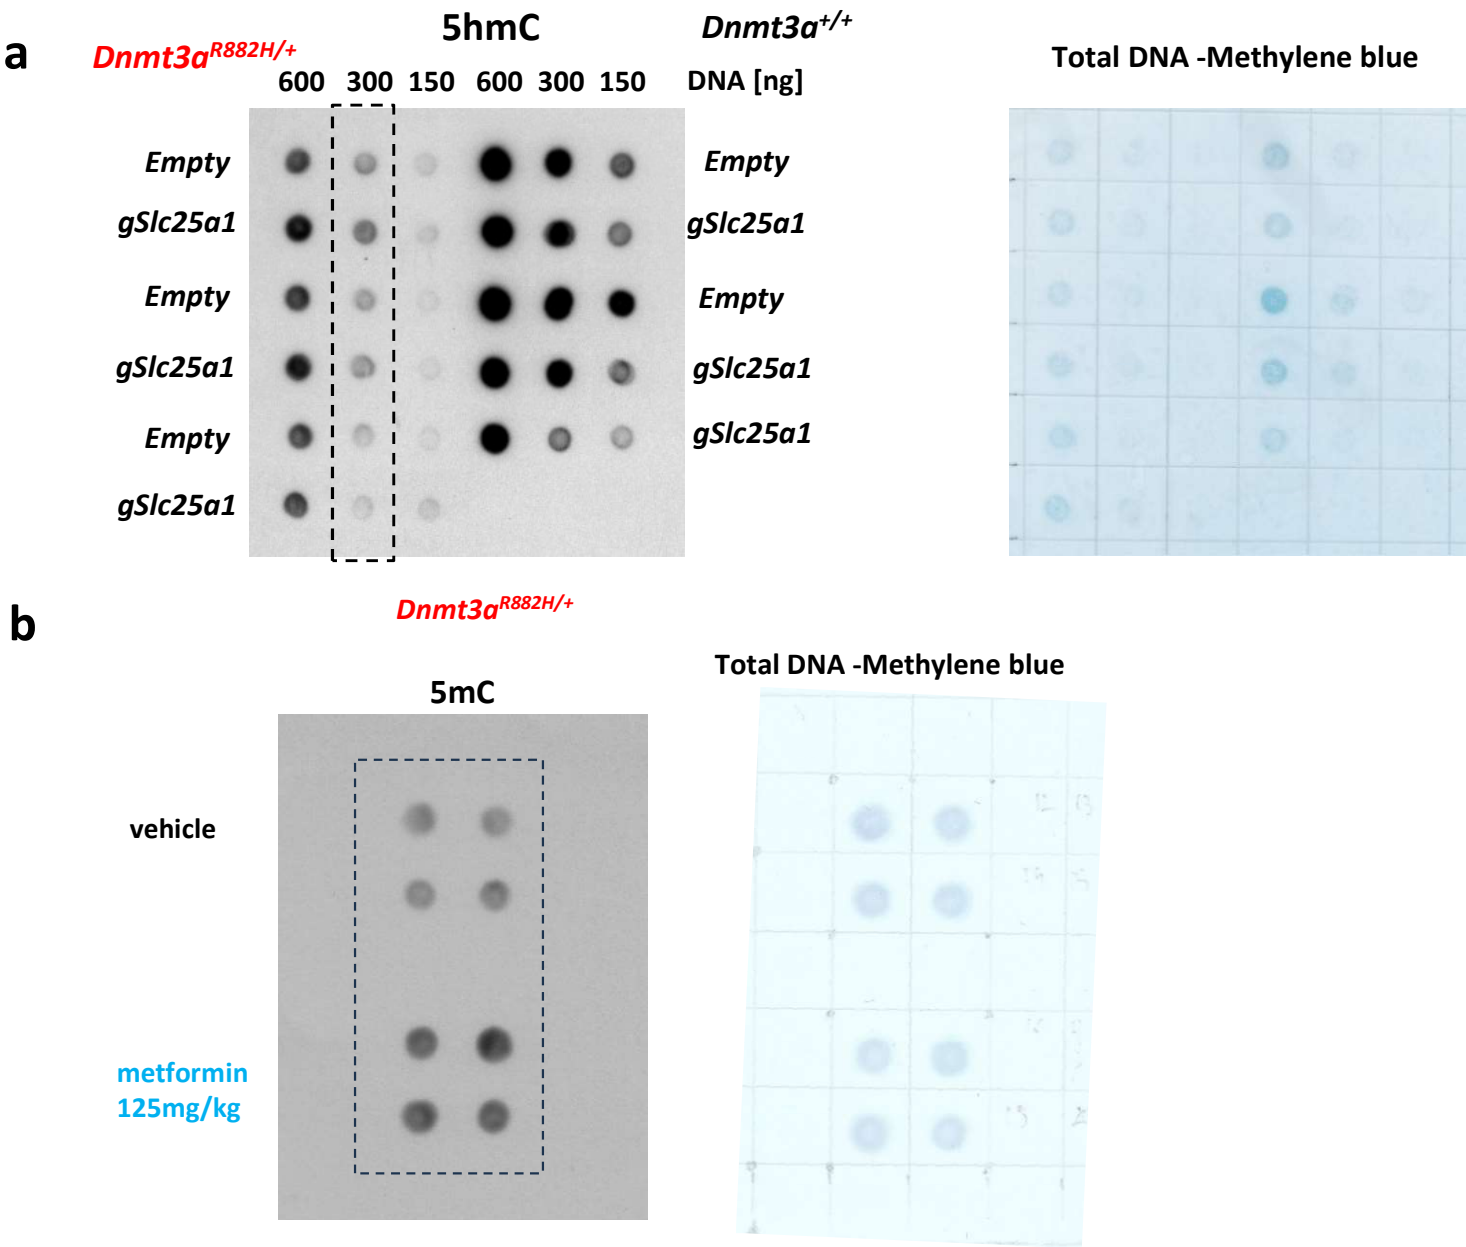

**Supplementary Figure 7. Unprocessed dot blot images for Extended data Fig.8k and 9b**  
(a-b) Unprocessed dot blot images are shown on the left, with corresponding total DNA image (DNA loading control – methylene blue staining) for each blot on the right. Cropping strategy is indicated with a dashed line. Data correspond to (a) Extended data Fig.8k (b) Extended data Fig.9b.



**Supplementary Figure 8**

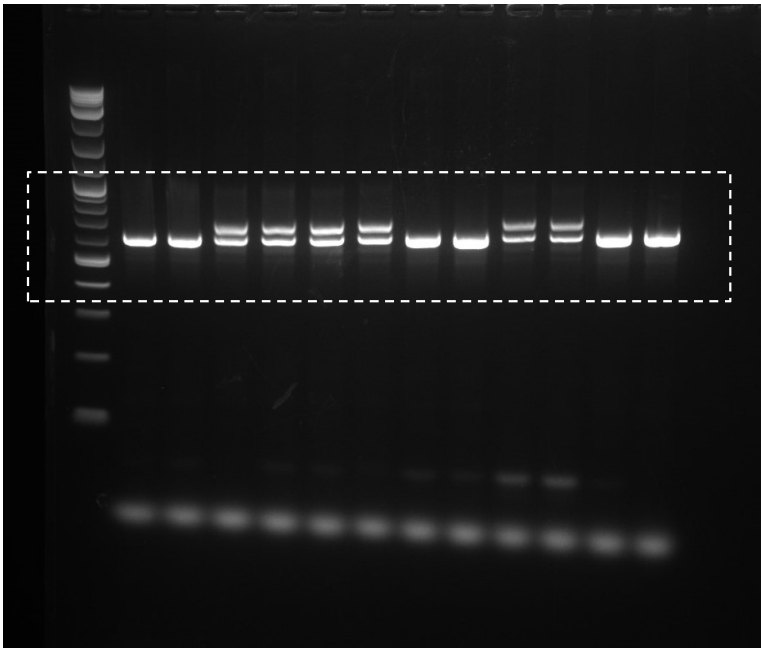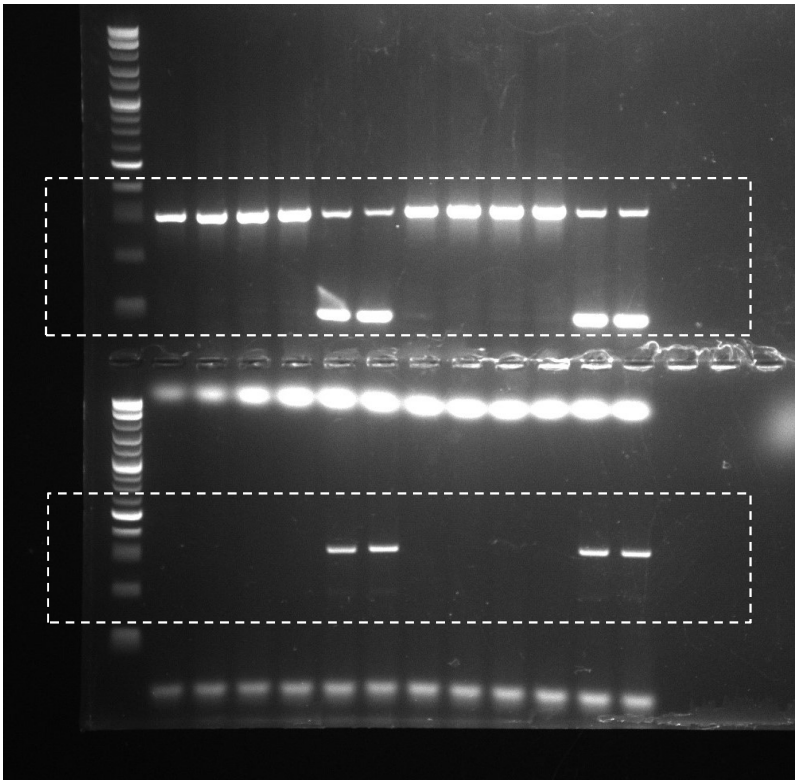

**Supplementary Figure 8. Unprocessed DNA gel images for Extended data Fig.1b**  
Unprocessed DNA gel images corresponding to Extended data Fig.1b. Cropping strategy is indicated with dashed line.
